# Supplementary material
Source: ML conference proceedings conference paper supplement (https://proceedings.mlr.press/v89/lejeune19a.html)
Supplement: Supplementary file [file lejeune19a-supp.pdf]

## A PROOFS OF LEMMAS AND FACTS

### A.1 Proof of Lemma 4

The proof is very similar to the proof of Lemma 2 of Heckel et al. (2018). There are several cases of  $q_1$  and  $b_2$  to consider. We will show each by contradiction, starting with the assumption that the termination condition is false and both  $\mathcal{E}_{\text{bad}}(q_1)$  and  $\mathcal{E}_{\text{bad}}(b_2)$  do not occur, all under the event  $\mathcal{E}_\alpha$ . Let  $\mathcal{E}_{\text{good}}(i)$  denote the complement of  $\mathcal{E}_{\text{bad}}(i)$ . It also will be useful to define the quantity

$$m_2 = \arg \max_{i \in \{(k+1), \dots, (k+h)\}} \alpha_i \quad (15)$$

such that  $b_2 = \arg \max_{i \in \{m_2, q_2\}} \alpha_i$ .

- i. When  $q_1 \leq k$  and  $b_2 > k+h$ , we have by  $\mathcal{E}_{\text{good}}(q_1)$  that

$$\widehat{d}_{q_1} + \alpha_{q_1} < \widehat{d}_{q_1} + 3\alpha_{q_1} \leq \gamma \quad (16)$$

and similarly that  $\widehat{d}_{b_2} - \alpha_{b_2} > \gamma$  by  $\mathcal{E}_{\text{good}}(b_2)$ . Since  $\widehat{d}_{q_2} - \alpha_{q_2} \geq \widehat{d}_{m_2} - \alpha_{m_2}$ , we have that  $\widehat{d}_{q_2} - \alpha_{q_2} > \gamma$  in both the case that  $b_2 = m_2$  and  $b_2 = q_2$ . Together, this implies that the termination condition (4) is true, which violates our assumption.

- ii. When  $q_1 \leq k$  and  $k < b_2 \leq k+h$ , we have first by  $\mathcal{E}_{\text{good}}(q_1)$  that  $\widehat{d}_{q_1} + 3\alpha_{q_1} \leq \gamma$ . Starting from here, and using the definition of  $q_1$ , we have for all  $i \in \widehat{\mathcal{S}}_{\text{close}}$ ,

$$\begin{aligned} \gamma &\geq \widehat{d}_{q_1} + \alpha_{q_1} + 2\alpha_{q_1} \\ &\geq \widehat{d}_i + \alpha_i + 2\alpha_{q_1} \\ &\geq d_i + 2\alpha_{q_1} \\ &> d_i. \end{aligned} \quad (17)$$

Now we let  $\Delta$  denote  $d_{k+1+h} - d_k$ . By definition of  $b_2$ , using  $\mathcal{E}_{\text{good}}(b_2)$ , we have that  $\alpha_j \leq \Delta/4$  for all  $j \in \widehat{\mathcal{S}}_{\text{middle}} \cup \{q_2\}$ . Then we can start from  $\gamma > \widehat{d}_{q_1} + \alpha_{q_1}$  to conclude that for all  $j \in \widehat{\mathcal{S}}_{\text{middle}} \cup \{q_2\}$ ,

$$\begin{aligned} \gamma &> \widehat{d}_{q_1} + \alpha_{q_1} \\ &\stackrel{(i)}{>} \widehat{d}_{q_2} - \alpha_{q_2} \\ &\geq \widehat{d}_{q_2} - \frac{\Delta}{4} \\ &\geq \widehat{d}_j - \frac{\Delta}{4} \\ &\geq d_j - \alpha_j - \frac{\Delta}{4} \end{aligned}$$

$$\geq d_j - \frac{\Delta}{2}, \quad (18)$$

where (i) comes from our assumption that the terminating condition (4) is false. Combining (17) and (18) along with  $\gamma + \Delta/2 = d_{k+1+h}$ , we obtain that  $d_{k+1+h} > d_i$  for all  $i \in \widehat{\mathcal{S}} \cup \{q_2\}$ , which is a contradiction, since there can be at most  $k+h$  values of  $d_i$  that are smaller than  $d_{k+1+h}$ .

- iii. When  $k < q_1 \leq k+h$  and  $b_2 > k+h$ , the case is similar to the previous case, except that we need to bound  $\alpha_i$  for  $i \in \widehat{\mathcal{S}}_{\text{middle}}$  in a different way. By  $\mathcal{E}_{\text{good}}(b_2)$ ,  $\widehat{d}_{q_2} \geq \widehat{d}_{b_2}$ , and  $\alpha_{b_2} \geq \alpha_{q_2}$ , we have analogously to (17), for all  $i \in \widehat{\mathcal{S}}_{\text{far}}$ ,

$$\begin{aligned} \gamma &\leq \widehat{d}_{b_2} - 3\alpha_{b_2} \\ &\leq \widehat{d}_{q_2} - \alpha_{q_2} - 2\alpha_{b_2} \\ &\leq d_i - 2\alpha_{b_2}. \end{aligned} \quad (19)$$

Equivalently,  $d_i \geq \gamma + 2\alpha_{b_2}$ . Since there are  $n-k-h$  values of  $i$  for which this inequality holds, it must hold for  $d_{k+1+h}$ , so we obtain

$$\alpha_{b_2} \leq \frac{d_{k+1+h} - \gamma}{2} = \frac{\Delta}{4}. \quad (20)$$

By definition of  $b_2$ ,  $\alpha_i \leq \Delta/4$  for all  $i \in \widehat{\mathcal{S}}_{\text{middle}} \cup \{q_2\}$ , and a contradiction can be reached similarly as in case ii.

- iv. For the case when both  $q_1, b_2 \in \{k+1, \dots, k+h\}$ , we first show that at least one of  $\gamma < \widehat{d}_{q_1} + \alpha_{q_1}$  or  $\gamma > \widehat{d}_{q_2} - \alpha_{q_2}$  is true. To see this, first suppose the former is false. Then using that the terminating condition (4) is false, we have

$$\gamma \geq \widehat{d}_{q_1} + \alpha_{q_1} > \widehat{d}_{q_2} - \alpha_{q_2}. \quad (21)$$

Now that we know that at least one of these inequalities holds, and we proceed similarly for each. First suppose that the former inequality,  $\gamma < \widehat{d}_{q_1} + \alpha_{q_1}$ , holds. Using that by  $\mathcal{E}_{\text{good}}(q_1)$  and  $\mathcal{E}_{\text{good}}(b_2)$  we have  $\alpha_i \leq \Delta/4$  for all  $i \in \{q_1, q_2\} \cup \widehat{\mathcal{S}}_{\text{middle}}$ , we have that, for all  $i \in \{q_1, q_2\} \cup \widehat{\mathcal{S}}_{\text{middle}}$ ,

$$\begin{aligned} \gamma &< \widehat{d}_{q_1} + \alpha_{q_1} \\ &\leq \widehat{d}_i + \alpha_{q_1} \\ &\leq d_i + \alpha_i + \alpha_{q_1} \\ &\leq d_i + \frac{\Delta}{2}. \end{aligned} \quad (22)$$

We also have for all  $j \in \widehat{\mathcal{S}}_{\text{far}}$  that

$$\begin{aligned} \gamma &< \widehat{d}_{q_1} + \alpha_{q_1} \\ &\leq \widehat{d}_{q_2} - \alpha_{q_2} + \alpha_{q_2} + \alpha_{q_1} \end{aligned}$$

$$\begin{aligned}
 &\leq \widehat{d}_j - \alpha_j + \alpha_{q_2} + \alpha_{q_1} \\
 &\leq d_j + \alpha_{q_2} + \alpha_{q_1} \\
 &\leq d_j + \frac{\Delta}{2}.
 \end{aligned} \tag{23}$$

Combining (22) and (23), we have that  $d_i > d_k$  for all  $i \in \{q_1\} \cup \widehat{\mathcal{S}}_{\text{middle}} \cup \widehat{\mathcal{S}}_{\text{far}}$ , which is a contradiction, since at most  $n - k$  values of  $i$  can satisfy this inequality.

The case that  $\gamma > \widehat{d}_{q_2} - \alpha_{q_2}$  is entirely analogous.

- v. When  $q_1 > k + h$  or  $b_2 \leq k$ , we can make similar arguments to the previous cases to reach a contradiction.

## A.2 Proof of Fact 5

First, when  $i \leq k$ , we have

$$\begin{aligned}
 \widehat{d}_i + 3\alpha_i &\leq d_i + 4\alpha_i \\
 &\leq d_i + \frac{\Delta_i}{2} \\
 &\leq \frac{d_{k+1+h} + d_i}{2} \leq \gamma,
 \end{aligned} \tag{24}$$

where the last inequality uses  $d_i \leq d_k$ , so  $\mathcal{E}_{\text{bad}}(i)$  does not occur. This is similarly shown for  $i > k + h$ . For  $k < i \leq k + h$ , that  $\mathcal{E}_{\text{bad}}(i)$  does not occur follows immediately from  $\alpha_i \leq \Delta_i/8 \leq \Delta_i/4$ .

## A.3 Proof of Fact 6

Recalling that  $\alpha_i(u) = \sqrt{\frac{2\beta(u, \delta/n)}{u}}$ , at  $\alpha_i(u) = \Delta_i/8$  we have that  $u = 2(\Delta_i/8)^{-2}\beta(u, \delta')$ , so we need to bound the greatest fixed point  $u^*$  of

$$f(u) = 2(\Delta_i/8)^{-2}\beta(u, \delta').$$

Let  $u_0 = 2(\Delta_i/8)^{-2}$ , and note that for all  $u \geq u_0$ ,

$$\begin{aligned}
 f'(u) &= \frac{2(\Delta_i/8)^{-2}(2)}{u \log(1.12u)} \\
 &\leq \frac{2(\Delta_i/8)^{-2}(2)}{2(\Delta_i/8)^{-2} \log((1.12)2(\Delta_i/8)^{-2})} \\
 &\leq \frac{2}{\log((1.12)32)} \\
 &< 1.
 \end{aligned} \tag{25}$$

The second inequality holds because  $\Delta_i \leq 2$ . Suppose that  $u^* > u_0$ . Using Taylor's theorem, we have that for some  $z \geq u_0$ ,

$$\begin{aligned}
 f(u_0) &= f(u^*) + f'(z)(u_0 - u^*) \\
 &= u^*(1 - f'(z)) + u_0 f'(z).
 \end{aligned} \tag{26}$$

Then

$$\begin{aligned}
 u^* &= \frac{f(u_0) - u_0 f'(z)}{1 - f'(z)} \\
 &\leq \frac{f(u_0)}{1 - f'(u_0)}.
 \end{aligned} \tag{27}$$

So, we can bound the greatest fixed point of  $f$  as

$$\begin{aligned}
 u^* &\leq \max \left\{ u_0, \frac{f(u_0)}{1 - f'(u_0)} \right\} \\
 &= 2(\Delta_i/8)^{-2} \max \left\{ 1, \frac{\beta(2(\Delta_i/8)^{-2}, \delta')}{1 - 2/\log((1.12)32)} \right\} \\
 &= c_1 \Delta_i^{-2} \beta(2(\Delta_i/8)^{-2}, \delta'),
 \end{aligned} \tag{28}$$

where  $c_1 = 128/(1 - 2/\log((1.12)32))$ . Since  $\widetilde{T}_i \leq u^* + 1$ , letting  $c_2 = c_1 + 1$ ,

$$\widetilde{T}_i \leq \frac{c_2}{\Delta_i^2} \log \left( 125 \frac{n}{\delta} \log \left( \frac{(1.12)128}{\Delta_i^2} \right) \right). \tag{29}$$

Then for  $c$  sufficiently large,

$$\widetilde{T}_i \leq c \log \left( \frac{n}{\delta} \right) \frac{\log(2 \log(2/\Delta_i))}{\Delta_i^2}. \tag{30}$$

## B ADDITIONAL THEOREM 2 PROOF DETAILS

In this section we provide details on bounding  $\sum_{i \in \mathcal{S}_1(\nu)} \mathbb{E}_\nu [N_i]$  that we omitted in the proof of Theorem 2. We consider the set  $\mathcal{M} = \{\ell_1, \dots, \ell_{h+1}\} \subseteq \mathcal{S}_1(\nu)$  and construct an alternative distribution  $\nu'$  such that under that distribution  $\mathcal{M} \subseteq \mathcal{S}_2(\nu')$ . Then under  $\nu'$ , if  $\mathcal{A}$  succeeds, then at most  $h$  elements of  $\mathcal{S}_2(\nu')$  can be in  $\widehat{\mathcal{S}}$ , meaning that at least one element of  $\mathcal{M}$  is not in  $\widehat{\mathcal{S}}$  and that  $\mathcal{E}$  does not occur. So, if  $\mathcal{A}$  succeeds with probability at least  $1 - \delta$ , then both  $\mathbb{P}_{\nu'}[\mathcal{E}] \geq 1 - \delta$  and  $\mathbb{P}_{\nu'}[\mathcal{E}] \leq \delta$ .

Our alternative distribution  $\nu'$  is defined as

$$\nu'_i = \begin{cases} \nu_{k+1+h}, & i \in \mathcal{M} \\ \nu_i, & \text{otherwise.} \end{cases}$$

Again, to avoid ties, for  $\ell \in \mathcal{M}$ , one should take  $\nu'_\ell = \nu_{k+1+h} + \varepsilon$  and let  $\varepsilon \rightarrow 0$ , but we omit this detail. The remainder of the arguments are entirely analogous to the case shown previously, giving us the bound

$$\sum_{i \in \mathcal{S}_1(\nu)} \mathbb{E}_\nu [N_i] \geq \log \frac{1}{2\delta} \sum_{i=1}^{k-h} \frac{d_{k+1+h}(1 - d_{k+1+h})}{(d_i - d_{k+1+h})^2}.$$
